# Supplementary material for: Facilitation of Contextual Fear Extinction by Orexin-1 Receptor Antagonism Is Associated with the Activation of Specific Amygdala Cell Subpopulations
Source: PubMed Central journal article supplement — Int J Neuropsychopharmacol. 2017 Apr 27;20(8):654–9. doi: 10.1093/ijnp/pyx029 (PMC5570099; doi:10.1093/ijnp/pyx029), 2017-04-27
Supplement: pyx029_suppl_Supplementary_results.pdf [file pyx029_suppl_Supplementary_results.pdf]

## Supplementary results

|                      |                             | VEH         |              | SB          |              |    |
|----------------------|-----------------------------|-------------|--------------|-------------|--------------|----|
| <b>RB+</b>           | total                       | 56.2        | ± 6.8        | 54.5        | ± 5.1        |    |
|                      | <b>PL-projecting</b> c-Fos+ | 7.4         | ± 0.8        | 5.6         | ± 0.6        |    |
| <b>IL-projecting</b> | total                       | 59.3        | ± 8.0        | 63.7        | ± 11.6       |    |
|                      | c-Fos+                      | <b>4.3</b>  | ± <b>0.5</b> | <b>7.7</b>  | ± <b>1.0</b> | *  |
| <b>c-Fos+</b>        | total                       | 40.6        | ± 3.8        | 66.9        | ± 8.2        | ** |
|                      | RB-                         | <b>28.8</b> | ± <b>4.2</b> | <b>55.1</b> | ± <b>6.7</b> | ** |

**Table S1.** Number of PL- and IL-projecting neurons per slice detected within the BLA and their colocalization with c-Fos (n = 6 mice per group). RB, retrobead; VEH, vehicle; SB, SB-334867. \*p<0.05, \*\*p<0.01 between treatments.

|                |        | VEH        |              | SB          |              |    |
|----------------|--------|------------|--------------|-------------|--------------|----|
| <b>CB+ PV+</b> | total  | 41.5       | ± 2.5        | 40.5        | ± 3.4        |    |
|                | c-Fos+ | 6.1        | ± 1.8        | 8.2         | ± 1.6        |    |
| <b>CB+ PV-</b> | total  | 78.0       | ± 7.3        | 83.5        | ± 7.7        |    |
|                | c-Fos+ | <b>9.7</b> | ± <b>0.7</b> | <b>16.4</b> | ± <b>1.6</b> | ** |
| <b>CB- PV+</b> | total  | 10.6       | ± 0.9        | 10.2        | ± 0.8        |    |
|                | c-Fos+ | 0.2        | ± 0.1        | 0.3         | ± 0.1        |    |
| <b>c-Fos+</b>  | total  | 40.7       | ± 3.0        | 63.3        | ± 4.8        | ** |
|                | CB-PV- | 24.6       | ± 1.6        | 38.4        | ± 3.6        | ** |

**Table S2.** Number of CB+ and PV+ neurons per slice detected within the BLA and their colocalization with c-Fos (n = 9 mice per group). CB, calbindin; PV, parvalbumin; VEH, vehicle; SB, SB-334867. \*\*p<0.01 between treatments.
